# Supplementary material for: Geranium and Lemon Essential Oils and Their Active Compounds Downregulate Angiotensin-Converting Enzyme 2 (ACE2), a SARS-CoV-2 Spike Receptor-Binding Domain, in Epithelial Cells
Source: PubMed Central journal article supplement (PMC7355681; doi:10.3390/plants9060770), 2020-06-19
Supplement: plants-09-00770-s001.pdf [file plants-09-00770-s001.pdf]

Supplementary information

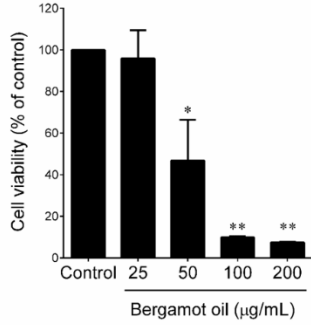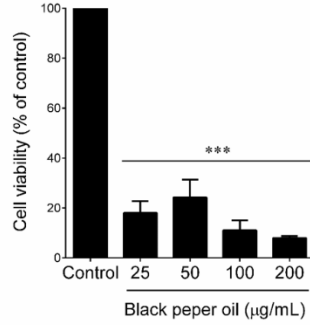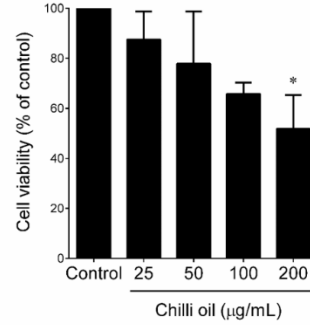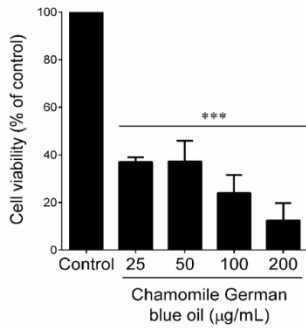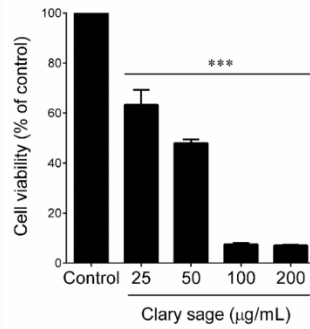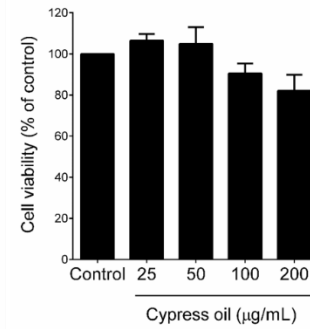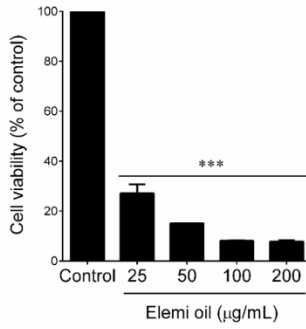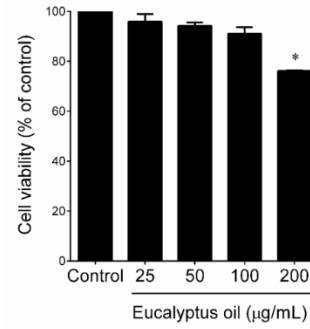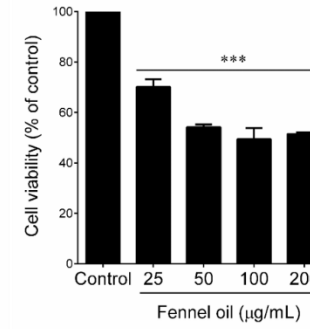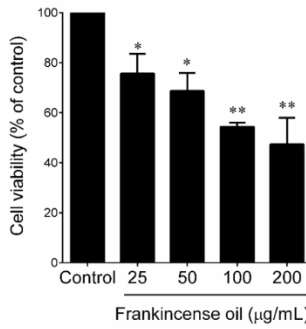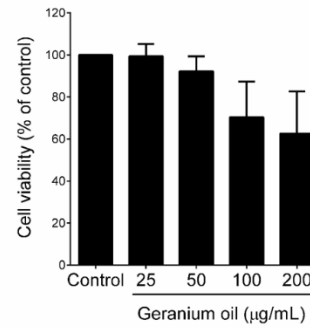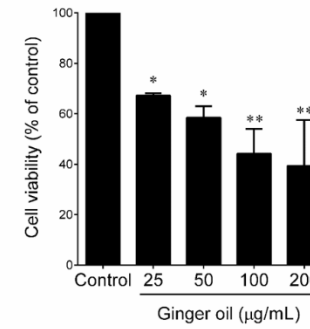

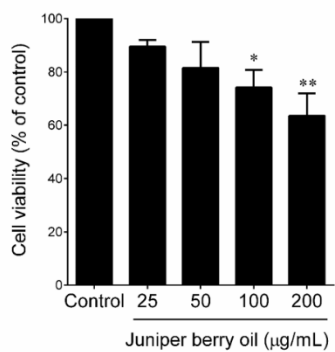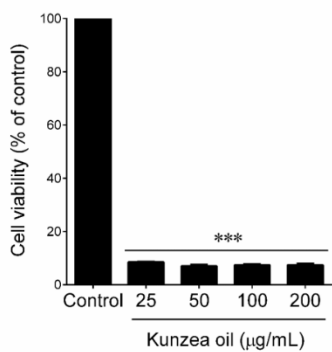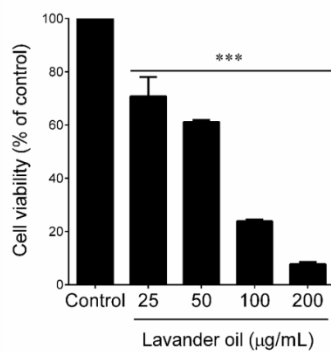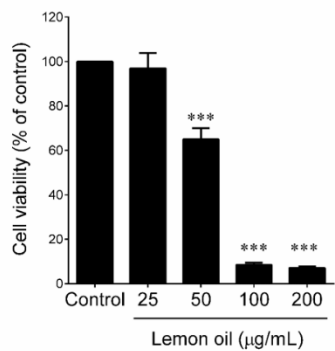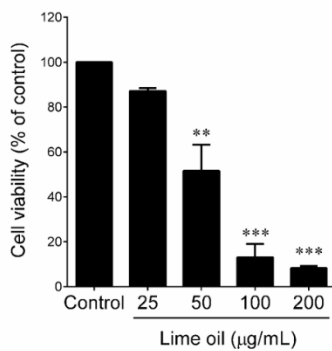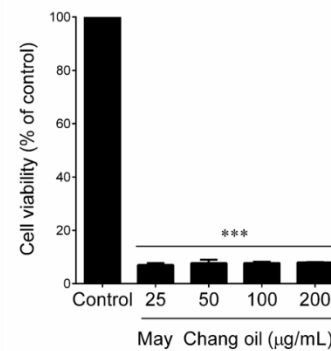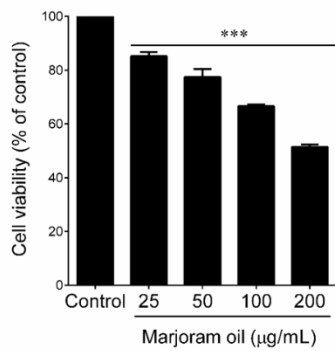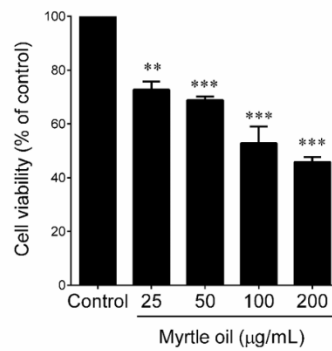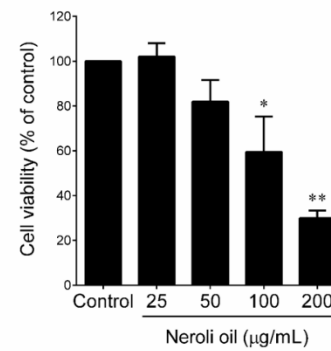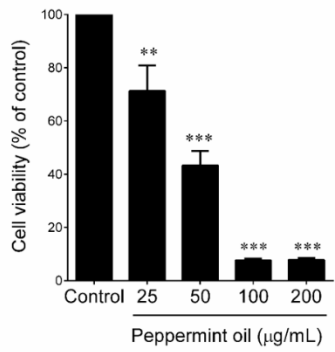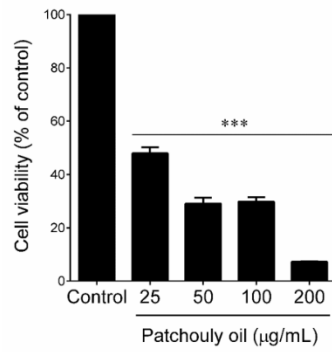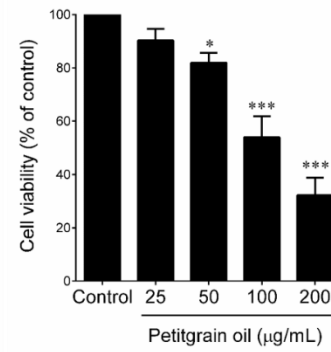

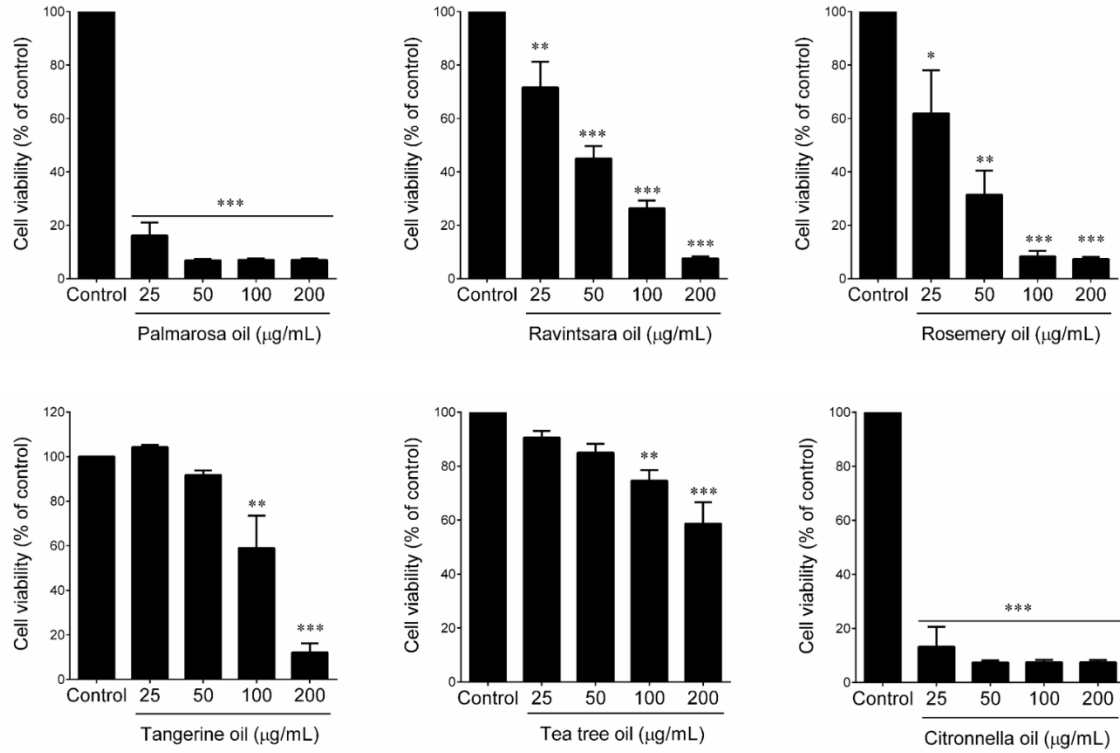

**Figure S1.** Cytotoxic effects of essential oils on HT-29 cells. HT-29 cells were incubated with increasing concentrations of essential oils (25-200 µg/mL) for 48 h. The cell viability was determined by the MTT colorimetric assay as described in materials and methods. Values represent the mean ± SD of three independent experiments. *P* values of less than 0.05\*, 0.01\*\*, and 0.001\*\*\* were considered statistically significant for the sample treatment group *vs.* the control group.

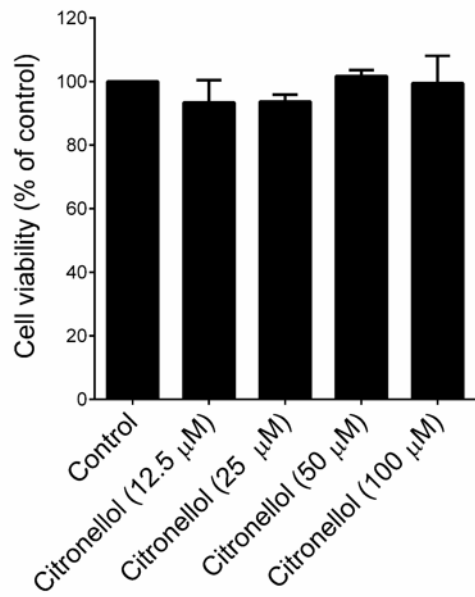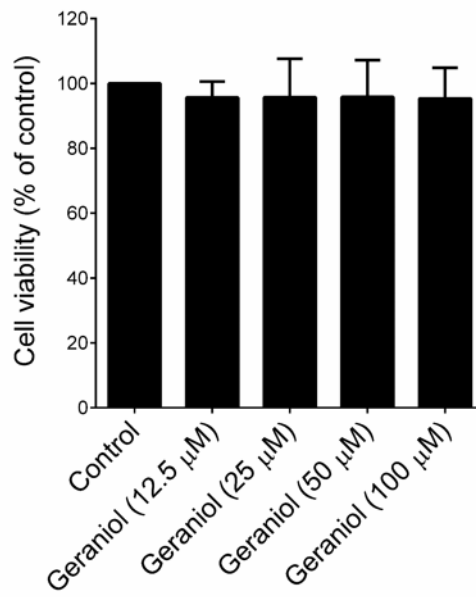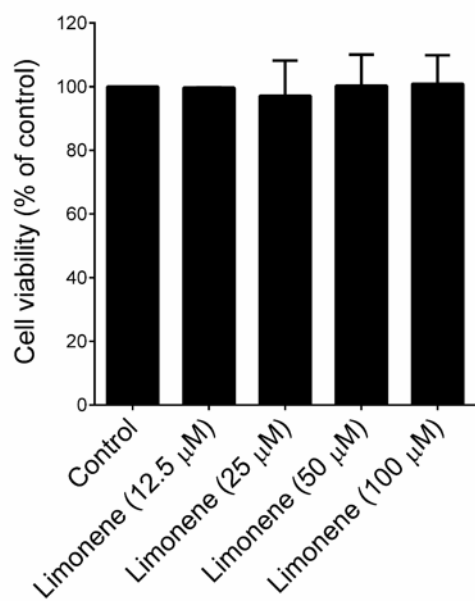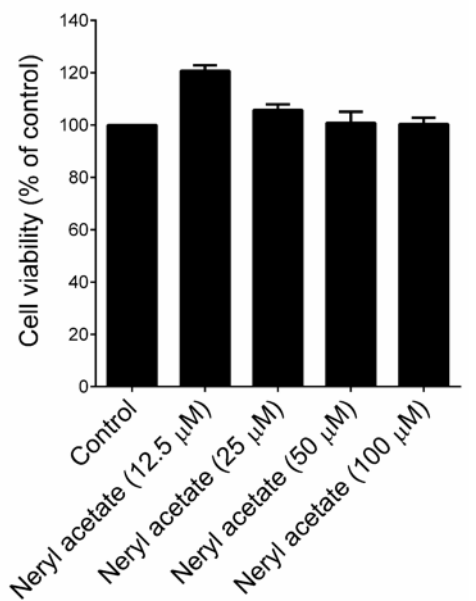

**Figure S2.** Cytotoxic effects of major compounds in geranium and lemon essential oils on HT-29 cells. HT-29 cells were incubated with increasing concentrations of pure compounds (12.5-100 μM) for 48 h. The cell viability was determined by the MTT colorimetric assay as described in materials and methods. Values represent the mean ± SD of three independent experiments.

**Table S1.** Main components and their relative contents (%) of Bergamot oil derived from citrus rind (peel) of *Citrus bergamia*.

| S.No | RT (min) | Compound            | Contents (%) | KI       |
|------|----------|---------------------|--------------|----------|
| 1    | 10.28    | $\alpha$ -Pinene    | 0.83         | 934.1944 |
| 2    | 12.06    | Sabinene            | 0.48         | 973.2925 |
| 3    | 12.26    | $\beta$ -Pinene     | 3.71         | 977.3195 |
| 4    | 12.89    | $\beta$ -Myrcene    | 0.33         | 989.588  |
| 5    | 14.49    | <i>p</i> -Cymene    | 2.64         | 1024.405 |
| 6    | 14.71    | Limonene            | 37.65        | 1029.342 |
| 7    | 16.12    | $\gamma$ -Terpinene | 5.5          | 1059.335 |
| 8    | 17.41    | Terpinolene         | 0.16         | 1084.56  |
| 9    | 18.18    | Linalool            | 10.15        | 1098.741 |
| 10   | 22.63    | $\alpha$ -Terpineol | 0.19         | 1192.815 |
| 11   | 24.64    | Neral               | 0.1          | 1237.704 |
| 12   | 25.26    | Linalyl acetate     | 36.82        | 1251.394 |
| 13   | 26       | Geranial            | 0.19         | 1267.301 |
| 14   | 30.08    | Neryl acetate       | 0.31         | 1358.893 |
|      |          | $\beta$ -           |              |          |
| 15   | 32.58    | Caryophyllene       | 0.15         | 1416.099 |

KI: Kovats index on a DB-5MS column in reference to *n*-alkanes. RT: Retention time.

**Table S2.** Main components and their relative contents (%) of cypress oil derived from needles of *Cupressus sempervirens*.

| <b>S.No</b> | <b>R.T (min)</b> | <b>Compounds</b>      | <b>Contents (%)</b> | <b>KI</b>   |
|-------------|------------------|-----------------------|---------------------|-------------|
| 1           | 10.25            | $\alpha$ -Pinene      | 50.1                | <b>933</b>  |
| 2           | 10.95            | Camphene              | 0.4                 | <b>950</b>  |
| 3           | 12.22            | $\beta$ -Pinene       | 1.9                 | <b>977</b>  |
| 4           | 12.86            | $\beta$ -Myrcene      | 0.7                 | <b>989</b>  |
| 5           | 13.69            | 3-Carene              | 20.8                | <b>1006</b> |
| 6           | 14.45            | <i>p</i> -Cymene      | 1.3                 | <b>1023</b> |
| 7           | 14.67            | Limonene              | 4.2                 | <b>1028</b> |
| 8           | 16.07            | $\gamma$ -Terpinene   | 0.5                 | <b>1058</b> |
| 9           | 17.37            | Terpinolene           | 1.7                 | <b>1084</b> |
| 10          | 21.88            | Terpinen-4-ol         | 0.7                 | <b>1178</b> |
| 11          | 22.58            | $\alpha$ -Terpineol   | 0.2                 | <b>1192</b> |
| 12          | 26.69            | L-bornyl acetate      | 0.6                 | <b>1282</b> |
| 13          | 29.45            | Nerol acetate         | 3.0                 | <b>1344</b> |
| 14          | 32.06            | Longifolene           | 0.3                 | <b>1403</b> |
| 15          | 32.35            | $\alpha$ -Cedrene     | 1.2                 | <b>1410</b> |
| 16          | 32.51            | $\beta$ -Caryophyllen | 0.5                 | <b>1414</b> |
| 17          | 32.67            | $\beta$ -Cedrene      | 0.3                 | <b>1418</b> |
| 18          | 33.14            | Thujopsene            | 0.3                 | <b>1430</b> |
| 19          | 33.99            | $\alpha$ -Humulene    | 0.1                 | <b>1451</b> |
| 20          | 34.82            | $\gamma$ -Muurolene   | 0.3                 | <b>1471</b> |
| 21          | 35.04            | Germacrene D          | 0.1                 | <b>1476</b> |
| 22          | 35.8             | $\alpha$ -Muurolene   | 0.2                 | <b>1494</b> |
| 23          | 36.59            | $\gamma$ -Cadinene    | 0.9                 | <b>1514</b> |
| 24          | 37.44            | $\alpha$ -Calacorene  | 0.1                 | <b>1536</b> |
| 25          | 39.01            | Caryophyllene oxide   | 0.1                 | <b>1576</b> |
| 26          | 40               | Cedrol                | 6.5                 | <b>1601</b> |

KI: Kovats index on a DB-5MS column in reference to *n*-alkanes. RT: Retention time.

**Table S3.** Main components and their relative contents (%) of Eucalyptus oil derived from leaves of *Eucalyptus globulus*.

| <b>S.No</b> | <b>RT (min)</b> | <b>Compound</b>        | <b>Contents (%)</b> | <b>KI</b>   |
|-------------|-----------------|------------------------|---------------------|-------------|
| 1           | 14.84           | Eucalyptol             | 82.9                | <b>1032</b> |
| 2           | 10.30           | $\alpha$ -Pinene       | 2.5                 | <b>935</b>  |
| 3           | 12.26           | $\beta$ -Pinene        | 0.2                 | <b>977</b>  |
| 4           | 12.91           | $\beta$ -Myrcene       | 0.2                 | <b>990</b>  |
| 5           | 13.62           | $\alpha$ -Phellandrene | 0.6                 | <b>1004</b> |
| 6           | 14.49           | <i>p</i> -Cymene       | 3.7                 | <b>1024</b> |
| 7           | 14.72           | Limonene               | 4.4                 | <b>1030</b> |
| 8           | 16.12           | $\gamma$ -Terpinene    | 5.0                 | <b>1059</b> |
| 9           | 17.41           | Terpinolene            | 0.1                 | <b>1085</b> |

KI: Kovats index on a DB-5MS column in reference to *n*-alkanes. RT: Retention time.

**Table S4.** Main components and their relative contents (%) of juniper berry oil derived from berries of *Juniperus communis*.

| S.No | RT (min) | Compound               | Contents (%) | KI   |
|------|----------|------------------------|--------------|------|
| 1    | 10.32    | $\alpha$ -Pinene       | 57.95        | 935  |
| 2    | 11.03    | Camphene               | 0.89         | 951  |
| 3    | 12.10    | Sabinene               | 0.27         | 974  |
| 4    | 12.30    | $\beta$ -Pinene        | 10.99        | 978  |
| 5    | 12.94    | $\beta$ -Myrcene       | 1.72         | 991  |
| 6    | 13.76    | 3-Carene               | 7.63         | 1007 |
| 7    | 14.52    | <i>p</i> -Cymene       | 1.70         | 1025 |
| 8    | 14.75    | Limonene               | 6.05         | 1030 |
| 9    | 17.44    | Terpinolene            | 0.31         | 1085 |
| 10   | 22.66    | $\alpha$ -Terpineol    | 0.58         | 1193 |
| 11   | 26.77    | Bornyl acetate         | 1.80         | 1283 |
| 12   | 29.57    | $\alpha$ -Cubebene     | 0.17         | 1347 |
| 13   | 30.76    | $\alpha$ -Copaene      | 0.24         | 1374 |
| 14   | 32.14    | Longifolene            | 2.64         | 1405 |
| 15   | 32.60    | $\beta$ -Caryophyllene | 3.96         | 1417 |
| 16   | 34.07    | $\alpha$ -Humulene     | 0.39         | 1453 |
| 17   | 36.66    | $\delta$ -Cadinene     | 0.50         | 1516 |
| 18   | 39.09    | Caryophyllene oxide    | 0.98         | 1578 |

KI: Kovats index on a DB-5MS column in reference to *n*-alkanes. RT: Retention time.



**Table S5.** Main components and their relative contents (%) of neroli oil derived from flowers of *Citrus aurantium*.

| S.No | R.T (min) | Compound                   | Contents (%) | KI   |
|------|-----------|----------------------------|--------------|------|
| 1    | 14.71     | Limonene                   | 12.0         | 1029 |
| 2    | 18.17     | Linalool                   | 14.6         | 1099 |
| 3    | 18.62     | Phenylethyl Alcohol        | 4.4          | 1109 |
| 4    | 22.62     | $\alpha$ -Terpineol        | 1.1          | 1193 |
| 5    | 25.23     | Linalyl acetate            | 33.3         | 1251 |
| 6    | 29.09     | Methyl anthranilate        | 9.4          | 1336 |
| 7    | 29.49     | $\delta$ -Elemene          | 1.2          | 1345 |
| 8    | 29.56     | $\alpha$ -Terpinyl acetate | 0.4          | 1347 |
| 9    | 30.06     | Neryl acetate              | 7.6          | 1358 |
| 10   | 30.92     | Geranyl acetate            | 10.6         | 1378 |
| 11   | 32.55     | $\beta$ -Caryophyllene     | 0.2          | 1415 |

KI: Kovats index on a DB-5MS column in reference to *n*-alkanes. RT: Retention time.

**Table S6.** Main components and their relative contents (%) of petitgrain oil derived from leaves and twigs of *Citrus aurantium*.

| S.No | RT (min) | Compound                        | Contents (%) | KI   |
|------|----------|---------------------------------|--------------|------|
| 1    | 12.29    | $\beta$ -Pinene                 | 0.5          | 978  |
| 2    | 12.93    | $\beta$ -Myrcene                | 0.7          | 990  |
| 3    | 13.76    | 3-Carene                        | 0.2          | 1007 |
| 4    | 14.74    | Limonene                        | 0.6          | 1030 |
| 5    | 15.13    | $\beta$ -Ocimene                | 0.4          | 1039 |
| 6    | 15.63    | <i>trans</i> - $\beta$ -Ocimene | 1.1          | 1049 |
| 7    | 17.44    | Terpinolene                     | 0.3          | 1085 |
| 8    | 18.19    | Linalool                        | 18.6         | 1099 |
| 9    | 22.65    | $\alpha$ -Terpineol             | 6.9          | 1193 |
| 10   | 24.06    | Nerol                           | 0.3          | 1225 |
| 11   | 25.27    | Linalyl acetate                 | 62.1         | 1252 |
| 12   | 29.52    | $\alpha$ -Terpinyl acetate      | 0.1          | 1346 |
| 13   | 30.09    | Neryl acetate                   | 2.5          | 1359 |
| 14   | 30.94    | Geranyl acetate                 | 4.0          | 1378 |
| 15   | 32.59    | Caryophyllene                   | 1.1          | 1416 |
| 16   | 34.07    | $\alpha$ -Humulene              | 0.1          | 1453 |

KI: Kovats index on a DB-5MS column in reference to *n*-alkanes. RT: Retention time.

**Table S7.** Main components and their relative contents (%) of tangerine oil derived from fruit peel of *Citrus reticulata*.

| S.No | RT (min) | Compound            | Contents (%) | KI   |
|------|----------|---------------------|--------------|------|
| 1    | 10.26    | $\alpha$ -Pinene    | 0.5          | 934  |
| 2    | 12.04    | $\beta$ -Pinene     | 0.1          | 973  |
| 3    | 12.86    | $\beta$ -Myrcene    | 0.7          | 989  |
| 4    | 14.45    | <i>p</i> -Cymene    | 0.6          | 1023 |
| 5    | 14.68    | Limonene            | 96.5         | 1029 |
| 6    | 16.08    | $\gamma$ -Terpinene | 1.2          | 1059 |
| 7    | 18.14    | Linalool            | 0.1          | 1098 |
| 8    | 35.51    | (+)-Valencene       | 0.1          | 1487 |

KI: Kovats index on a DB-5MS column in reference to *n*-alkanes. RT: Retention time.

**Table S8.** Main components and their relative contents (%) of tea tree oil derived from leaves of *Mellaleuca alternifolia*.

| S.No | RT (min) | Compound            | Contents (%) | KI   |
|------|----------|---------------------|--------------|------|
| 1    | 14.16    | $\alpha$ -Terpinene | 0.1          | 1017 |
| 2    | 14.51    | <i>p</i> -Cymene    | 0.2          | 1025 |
| 3    | 14.80    | $\beta$ -Ocimene    | 0.1          | 1031 |
| 4    | 16.15    | $\gamma$ -Terpinene | 0.1          | 1060 |
| 5    | 17.43    | Terpinolene         | 0.2          | 1085 |
| 6    | 17.66    | <i>p</i> -Cymenene  | 0.0          | 1089 |
| 7    | 18.18    | Linalool            | 0.1          | 1099 |
| 8    | 19.30    | Allo-Ocimene        | 0.4          | 1124 |
| 9    | 21.97    | Terpinen-4-ol       | 97.9         | 1180 |
| 10   | 25.35    | $\beta$ -Citral     | 0.3          | 1253 |

KI: Kovats index on a DB-5MS column in reference to *n*-alkanes. RT: Retention time.
